# Supplementary material for: Production of cupcake-like dessert containing microbial biosurfactant as an emulsifier
Source: PeerJ. 2020 Apr 22;8:e9064. doi: 10.7717/peerj.9064 (PMC7183308; doi:10.7717/peerj.9064)
Supplement: Supplemental Information 2 [file peerj-08-9064-s002.xlsx]

## Sheet: CMC
	Concentration (g/L)	Surface tension (mN/m)											Concentration (g/L)	Surface tension (mN/m)	mean
	1	25.146											1	25.203	25.146
	0.9	25.12												25.122
	0.8	25.254												25.113
	0.7	25.408											0.9	25.189	25.12
	0.6	25.591												25.105
	0.5	26.267												25.066
	0.4	27.331											0.8	25.321	25.254
	0.3	28.844												25.285
	0.2	31.209												25.156
	0.1	34.49											0.7	25.482	25.408
	0	72												25.401
														25.341
													0.6	25.674	25.591
														25.592
														25.507
													0.5	26.375	26.267
														26.3
														26.126
													0.4	27.4	27.331
														27.374
														27.219
													0.3	28.958	28.844
														28.812
														28.762
													0.2	31.314	31.209
														31.206
														31.107
													0.1	34.525	34.49
														34.497
														34.448
													0	72	72
														72
														72
