# Supplementary material for: Production of cupcake-like dessert containing microbial biosurfactant as an emulsifier
Source: PeerJ. 2020 Apr 22;8:e9064. doi: 10.7717/peerj.9064 (PMC7183308; doi:10.7717/peerj.9064)
Supplement: Supplemental Information 3 [file peerj-08-9064-s003.xlsx]

## Sheet: DSC-TG
				Temp,/°C	Time/min	DSC/(mW/mg)	Mass/%	Gas Flow(purge2)/(ml/min)	Gas Flow(protective)/(ml/min)	Sensit,/(uV/mW)
				26.764	0.07621	-0.010032	99.8724	50	49.7271	0.77603
				29.264	1.73896	-0.11255	99.8949	50	50	0.77706
				31.764	2.31492	-0.16397	99.8367	50	50	0.77809
				34.264	2.75346	-0.20929	99.7907	50	50	0.77909
				36.764	3.11384	-0.25168	99.7639	50	50	0.78008
				39.264	3.42573	-0.29413	99.7378	50	50	0.78105
				41.764	3.70377	-0.33469	99.7075	50	50	0.782
				44.264	3.95859	-0.37372	99.6758	50	50	0.78293
				46.764	4.19592	-0.41083	99.6289	50	50	0.78385
				49.264	4.41868	-0.44353	99.5938	50	50	0.78475
				51.764	4.62994	-0.48065	99.5658	50	50	0.78563
				54.264	4.83281	-0.51615	99.5087	50	50	0.78649
				56.764	5.02734	-0.55092	99.4815	50	50	0.78734
				59.264	5.21607	-0.58953	99.4257	50	50	0.78816
				61.764	5.39909	-0.62787	99.3766	50	50	0.78897
				64.264	5.57774	-0.66661	99.3131	50	50	0.78976
				66.764	5.75284	-0.70492	99.2654	50	50	0.79054
				69.264	5.92449	-0.74103	99.1854	50	50	0.79129
				71.764	6.09359	-0.77536	99.1131	50	50	0.79203
				74.264	6.26067	-0.80747	99.054	50	50	0.79275
				76.764	6.42555	-0.8425	98.9637	50	50	0.79345
				79.264	6.58914	-0.87501	98.8796	50	50	0.79413
				81.764	6.7518	-0.90967	98.7683	50	50	0.79479
				84.264	6.91263	-0.94438	98.6437	50	50	0.79543
				86.764	7.07256	-0.98199	98.5259	50	50	0.79606
				89.264	7.23232	-1.01922	98.3783	50	50	0.79667
				91.764	7.39163	-1.05784	98.2057	50	50	0.79725
				94.264	7.55032	-1.09785	98.0112	50	50	0.79782
				96.764	7.70958	-1.13868	97.7879	50	50	0.79837
				99.264	7.86922	-1.17967	97.6129	50	50	0.79891
				101.764	8.02956	-1.22165	97.3958	50	50	0.79942
				104.264	8.19086	-1.26475	97.1558	50	50	0.79991
				106.764	8.35321	-1.30841	96.9115	50	50	0.80039
				109.264	8.5172	-1.33948	96.6741	50	50	0.80085
				111.764	8.68323	-1.34693	96.4152	50	50	0.80128
				114.264	8.8506	-1.31867	96.1751	50	50	0.8017
				116.764	9.01888	-1.26396	95.9469	50	50	0.8021
				119.264	9.18818	-1.19772	95.737	50	50	0.80248
				121.764	9.35924	-1.13281	95.5538	50	50	0.80284
				124.264	9.53184	-1.08483	95.3616	50	50	0.80319
				126.764	9.70756	-1.0462	95.1926	50	50	0.80351
				129.264	9.88573	-1.01352	94.9975	50	50	0.80381
				131.764	10.0668	-0.98847	94.8485	50	50	0.8041
				134.264	10.2518	-0.98742	94.6761	50	50	0.80436
				136.764	10.4408	-0.99874	94.4666	50	50	0.80461
				139.264	10.6344	-1.01694	94.2454	50	50	0.80484
				141.764	10.8324	-1.03015	94.0464	50	50	0.80504
				144.264	11.0348	-1.00634	93.8381	50	50	0.80523
				146.764	11.2409	-0.91946	93.6334	50	50	0.8054
				149.264	11.4505	-0.82003	93.4594	50	50	0.80555
				151.764	11.6643	-0.74471	93.3476	50	50	0.80568
				154.264	11.8842	-0.68724	93.2338	50	50	0.80579
				156.764	12.1102	-0.62605	93.1233	50	50	0.80589
				159.264	12.3419	-0.56189	93.0244	50	50	0.80596
				161.764	12.58	-0.50802	92.9692	50	50	0.80601
				164.264	12.8244	-0.47015	92.9482	50	50	0.80605
				166.764	13.0757	-0.44399	92.9139	50	50	0.80606
				169.264	13.334	-0.42472	92.8922	50	50	0.80606
				171.764	13.5983	-0.41051	92.8641	50	50	0.80603
				174.264	13.8682	-0.39865	92.8431	50	50	0.80599
				176.764	14.1435	-0.38925	92.8221	50	50	0.80593
				179.264	14.423	-0.38358	92.8081	50	50	0.80584
				181.764	14.7064	-0.37966	92.7808	50	50	0.80574
				184.264	14.9922	-0.37701	92.7521	50	50	0.80562
				186.764	15.2794	-0.37755	92.7176	50	50	0.80548
				189.264	15.5678	-0.38044	92.703	50	50	0.80532
				191.764	15.8566	-0.38564	92.6605	50	50	0.80515
				194.264	16.1441	-0.3941	92.6098	50	50	0.80495
				196.764	16.4306	-0.40363	92.598	50	50	0.80473
				199.264	16.7169	-0.41769	92.542	50	50	0.80449
				201.764	17.0015	-0.43397	92.5071	50	50	0.80424
				204.264	17.2828	-0.45267	92.486	50	50	0.80396
				206.764	17.5619	-0.47238	92.4362	50	50	0.80367
				209.264	17.8386	-0.4903	92.402	50	50	0.80336
				211.764	18.1123	-0.50643	92.3676	50	50	0.80303
				214.264	18.3835	-0.51969	92.3249	50	50	0.80267
				216.764	18.6524	-0.53432	92.2829	50	50	0.8023
				219.264	18.9179	-0.54932	92.2422	50	50	0.80191
				221.764	19.1816	-0.56941	92.2053	50	50	0.80151
				224.264	19.443	-0.58298	92.1639	50	50	0.80108
				226.764	19.702	-0.57847	92.1212	50	50	0.80063
				229.264	19.958	-0.57241	92.0944	50	50	0.80017
				231.764	20.2127	-0.56539	92.0581	50	50	0.79968
				234.264	20.4652	-0.53757	92.0028	50	50	0.79918
				236.764	20.7155	-0.49486	91.9615	50	50	0.79866
				239.264	20.965	-0.46482	91.9083	50	50	0.79812
				241.764	21.2131	-0.45843	91.8558	50	50	0.79756
				244.264	21.4615	-0.46096	91.8276	50	50	0.79698
				246.764	21.7094	-0.4631	91.7795	50	50	0.79638
				249.264	21.9565	-0.45801	91.7227	50	50	0.79577
				251.764	22.2043	-0.44604	91.682	50	50	0.79513
				254.264	22.4508	-0.43923	91.6317	50	50	0.79448
				256.764	22.6969	-0.43978	91.6104	50	50	0.79381
				259.264	22.9435	-0.43845	91.5896	50	50	0.79312
				261.764	23.1891	-0.43533	91.5614	50	50	0.79241
				264.264	23.4356	-0.43293	91.5113	50	50	0.79168
				266.764	23.6815	-0.43148	91.4767	50	50	0.79094
				269.264	23.9274	-0.43403	91.4357	50	50	0.79017
				271.764	24.1742	-0.43523	91.3851	50	50	0.78939
				274.264	24.4206	-0.43397	91.3447	50	50	0.78859
				276.764	24.6674	-0.43403	91.2817	50	50	0.78778
				279.264	24.9142	-0.4338	91.2258	50	50	0.78694
				281.764	25.1614	-0.43724	91.1686	50	50	0.78609
				284.264	25.4085	-0.43404	91.0851	50	50	0.78522
				286.764	25.6569	-0.42852	90.9891	50	50	0.78433
				289.264	25.9057	-0.41903	90.8925	50	50	0.78342
				291.764	26.1543	-0.40034	90.8185	50	50	0.78249
				294.264	26.4016	-0.3445	90.7346	50	50	0.78155
				296.764	26.6493	-0.29842	90.6308	50	50	0.78059
				299.264	26.897	-0.286	90.519	50	50	0.77961
				301.764	27.1459	-0.25016	90.4118	50	50	0.77862
				304.264	27.3955	-0.25213	90.2901	50	50	0.77761
				306.764	27.6452	-0.21366	90.1757	50	50	0.77658
				309.264	27.8934	-0.19908	90.0308	50	50	0.77553
				311.764	28.1436	-0.18773	89.9021	50	50	0.77446
				314.264	28.3963	-0.19092	89.7754	50	50	0.77338
				316.764	28.6478	-0.1657	89.6788	50	50	0.77229
				319.264	28.899	-0.17492	89.5806	50	50	0.77117
				321.764	29.1509	-0.18808	89.4738	50	50	0.77004
				324.264	29.4025	-0.18915	89.3688	50	50	0.76889
				326.764	29.6551	-0.18694	89.2567	50	50	0.76772
				329.264	29.9068	-0.19739	89.1426	50	50	0.76654
				331.764	30.1584	-0.22693	89.0343	50	50	0.76534
				334.264	30.4131	-0.25584	88.9357	50	50	0.76413
				336.764	30.6656	-0.27577	88.8375	50	50	0.7629
				339.264	30.9175	-0.28562	88.7325	50	50	0.76165
				341.764	31.1689	-0.29264	88.6417	50	50	0.76038
				344.264	31.4212	-0.29043	88.5352	50	50	0.7591
				346.764	31.6739	-0.30756	88.4399	50	50	0.75781
				349.264	31.9253	-0.31236	88.3531	50	50	0.75649
				351.764	32.1755	-0.3037	88.2483	50	50	0.75517
				354.264	32.4279	-0.31444	88.1188	50	50	0.75382
				356.764	32.6794	-0.32731	88.0184	50	50	0.75246
				359.264	32.9302	-0.32969	87.9061	50	50	0.75109
				361.764	33.1802	-0.29706	87.7871	50	50	0.7497
				364.264	33.4318	-0.31453	87.6822	50	50	0.74829
				366.764	33.6822	-0.32226	87.5602	50	50	0.74687
				369.264	33.9316	-0.29697	87.4307	50	50	0.74543
				371.764	34.1825	-0.31735	87.336	50	50	0.74398
				374.264	34.4315	-0.26739	87.1832	50	50	0.74252
				376.764	34.6823	-0.30289	87.0447	50	50	0.74103
				379.264	34.9328	-0.31852	86.9121	50	50	0.73954
				381.764	35.1839	-0.30475	86.7875	50	50	0.73803
				384.264	35.4337	-0.27794	86.6458	50	50	0.7365
				386.764	35.6818	-0.19454	86.5042	50	50	0.73496
				389.264	35.9285	-0.063442	86.3455	50	50	0.73341
				391.764	36.1725	0.003174	86.167	50	50	0.73184
				394.264	36.4193	0.027977	85.8971	50	50	0.73026
				396.764	36.6673	0.1149	85.6346	50	50	0.72866
				399.264	36.9154	0.19691	85.3354	50	50	0.72705
