# Supplementary material for: Production of cupcake-like dessert containing microbial biosurfactant as an emulsifier
Source: PeerJ. 2020 Apr 22;8:e9064. doi: 10.7717/peerj.9064 (PMC7183308; doi:10.7717/peerj.9064)
Supplement: Supplemental Information 4 [file peerj-08-9064-s004.xlsx]

## Sheet: Planilha1
	Surface tension	Mean	SD		Bio	Soy	Mean	SD		Bio	Corn	Mean	SD		Bio	Canola	Mean	SD
	30.82	30.79	0.0424264		1/2 CMC	40.93	41.155	0.318198		1/2 CMC	39.2857	39.2857	0		1/2 CMC	40	45.4365	1.40299
	30.76					41.38					39.2857					44.4444
					CMC	48.28	45.805	3.50018			48.1481					46.4286
	Interfacial tension	Mean	SD			43.33				CMC	53.5714	48.2759	0		CMC	44.8276	50.8621	1.21915
	0.762	0.7295	0.0459619		2x CMC	51.83	51.775	0.0777817			48.2759					50
	0.697					51.72					48.2759					51.7241
										2x CMC	48.28	56.325	0.487904		2x CMC	44.8276	44.636	0.270922
											56.67					44.4444
											55.98					37.931
					Bio	Sunflower	Mean	SD		Bio	Peanut	Mean	SD		Goma	Soy	Corn	Canola	Sunflower	Peanut
					1/2 CMC	42.8571	54.6112	0.793666		1/2 CMC	55.5556	69.4828	0.73149		1	46.6667	66.6667	51.8519	30	41.3793
						54.05					68.9655				2	49.2857	-	-	31.48	-
						55.1724					70				3	48.3871	66.875	53.3333	30	43.3333
					CMC	50	49.78	0.311127		CMC	68.9655	68.9655	0		Média	48.1132	66.7708	52.5926	30.4933	42.3563
						49.56					68.9655				DP	1.33084	0.147314	1.04757	0.854478	1.3817
						34.4828					68.9655
					2x CMC	44.8276	56.7212	2.19032		2x CMC	66.6667	62.7011	0.894043
						55.1724					62.069
						58.27					63.3333
