# Supplementary material for: Production of cupcake-like dessert containing microbial biosurfactant as an emulsifier
Source: PeerJ. 2020 Apr 22;8:e9064. doi: 10.7717/peerj.9064 (PMC7183308; doi:10.7717/peerj.9064)
Supplement: Supplemental Information 5 [file peerj-08-9064-s005.xlsx]

## Sheet: Planilha1
		Weight				Bio weight				Height				Height Bio
		44.803				45.108				40.43				34.61
		44.879	mean	44.841		44.802	mean	44.955		42.1	mean	41.265		37.34	mean	35.975
			SD	0.0537401			SD	0.216375			SD	1.18087			SD	1.9304
		Diameter padrão				Bio diameter
		59.3				57.62
		58.94	mean	59.12		57.64	média	57.63
			SD	0.254558			DP	0.0141421
						Formulation	Weight (g)	height (mm)	Diamter (mm)
						Standard	44,841 ± 0,05	41,265 ± 1,18	59,12 ± 0,25
						A	44,955 ± 0,22	35,975 ± 1,93	57,63 ± 0,01
