# Supplementary material for: Production of cupcake-like dessert containing microbial biosurfactant as an emulsifier
Source: PeerJ. 2020 Apr 22;8:e9064. doi: 10.7717/peerj.9064 (PMC7183308; doi:10.7717/peerj.9064)
Supplement: Supplemental Information 6 [file peerj-08-9064-s006.xlsx]

## Sheet: Planilha1
		Weight (75%)				Weight (100%)				Height (75%)				Height (100%)
		43.722				44.663				47.55				42.68
		43.702	mean	43.712		44.246	mean	44.5757		46.22	mean	46.885		42.19	mean	42.435
			SD	0.0141421		44.818	SD	0.295832			SD	0.940452			SD	0.346482
		Diameter (75%)				Diameter (100%)
		59.65				58.09
		59.14	mean	59.395		57.13	mean	57.61
			SD	0.360624			SD	0.678823
						formulation	Weight (g)	Height (mm)	Diameter (mm)
						0.75	43,712 ± 0,01	46,885 ± 0,94	59,400 ± 0,36
						1	44,576 ± 0,29	42,435 ± 0,35	57,610 ± 0,68
