# Supplementary material for: Production of cupcake-like dessert containing microbial biosurfactant as an emulsifier
Source: PeerJ. 2020 Apr 22;8:e9064. doi: 10.7717/peerj.9064 (PMC7183308; doi:10.7717/peerj.9064)
Supplement: Supplemental Information 7 [file peerj-08-9064-s007.xlsx]

## Sheet: Planilha1
			Moisture	Ashes	Lipids	Proeteins	Carbohydrates	Energy	pH
		Standard	26.63	2.52	18.35	6.87	45.63	375.15	8.2
			26.23	2.49	21.09	6.85	43.34	390.57	8.19
		0.5	26.01	2.08	20.91	6.51	44.49	392.19	6.6
			26.5	2.07	16.31	6.4	48.72	367.27	6.6
		0.75	20.8	1.95	18.8	4.15	54.3	403	6.5
			20.7	1.95	19.5	4.13	53.72	406.9	6.5
		1	19.6	1.7	22.1	3.16	53.44	425.3	6.3
			19.3	1.75	22.9	3.19	52.86	430.3	6.3
		test tukey 95% de confiança
	Samples	Moisture	Ashes	Lipids	Proeteins	Carbohydrates	Energy	pH
	Standard	26,43 ±0,28 a	2,50 ±0,02 a	19,72 ±1,94 a	6,86 ±0,01 a	44,48 ±1,62 a	382,86 ±10,90 a	8,19 ±0,01 a
	0.5	26,25 ±0,35 a	2,07 ±0,01 b	18,61 ±3,25 a	6,45 ±0,08 b	46,60 ± 2,99 a,c	379,73 ±17,62 a	6,60 ±0,00 b
	0.75	20,75±0,07 b	1,95±0,00 c	19,15 ±0,49 a	4,14 ±0,01 c	54,01 ±0,41 b	404,95 ±2,76 a,b	6,50 ±0,00 c
	1	19,45 ±0,21 c	1,72 ±0,03 d	22,50 ±0,56 a	3,17 ±0,02 d	53,15 ±0,41 b,c	427,80 ±3,53 b	6,30 ±0,00 d
		Valores seguidos de letras iguais comparados na vertical não diferem entre si significativamente
